# Supplementary material
Source: PubMed Central journal article supplement (PMC3298172)
Supplement: supp_78.6.1765_AEM7027-11_supplemental.pdf [file supp_78.6.1765_AEM7027-11_supplemental.pdf]

## Supplemental material

**Table S1. Primers used in the study**

| Name                            | Sequence (5' to 3')                   | Size of amplicon (bp) | Application |
|---------------------------------|---------------------------------------|-----------------------|-------------|
| <i>ptuf</i> -bamH1-F            | TATGCG <u>GATCCC</u> GACCGGTTTTCCCG   | 256                   | PCR         |
| <i>ptuf</i> -xba1-R             | TATGCT <u>CTAGACT</u> G GGGCTCCTCCTG  |                       |             |
| <i>gtfF</i> - <i>Xba</i> I-F    | TATGCT <u>CTAGA</u> ATGACCAAGTCTCCCG  | 1558                  | PCR         |
| <i>gtfF</i> - <i>Hind</i> III-R | TATGCA <u>AAGCTTT</u> CAGGCCCGCTGCAAC |                       |             |
| F1                              | TGGTGACGCCGAAGGACTC                   | 144                   | RT-qPCR     |
| R1                              | GCAGCACGAGCAGGAACAC                   |                       |             |
| GroL1-F                         | CCACGGATCTTGTTGACC                    | 164                   | RT-qPCR     |
| GroL1-R                         | CCACGGATCTTGTTGACC                    |                       |             |

The underlined sequences indicate the position of the restriction sites

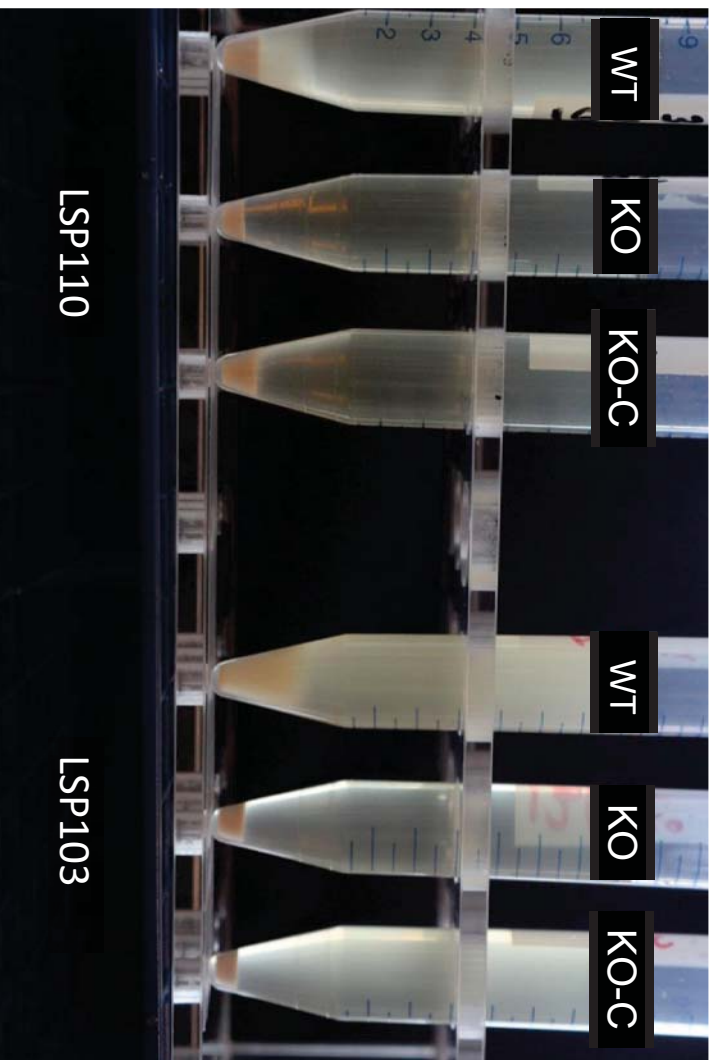

**Supplemental data / Fig S1:** Macroscopic views of cultures of strains of *Propionibacterium freudenreichii* producing or not a  $\beta$ -glucan surface polysaccharide. The strains of *P. freudenreichii* were cultivated in YEL medium without agitation. The cultures were observed after 48h of incubation at 30°C without stirring for their abilities to sedimentation.
